# Supplementary material for: The Role of Hepatitis C Virus Core Antigen Testing in the Era of Direct Acting Antiviral Therapies: What We Can Learn from the Protease Inhibitors
Source: PubMed Central journal article supplement (PMC5053597; doi:10.1371/journal.pone.0163900), 2016-10-06
Supplement: pone.0163900.s001.pdf [file pone.0163900.s001.pdf]

## SUPPORTING INFORMATION

### RESEARCH ARTICLE

**Title: The Role of Hepatitis C Virus Core Antigen Testing in the Era of Direct Acting Antiviral Therapies: What We Can Learn from the Protease Inhibitors**

S1 Table. Membership of Irish Hepatitis C Outcomes Research Network (ICORN)

| No. | Name                                              | Hospital/Organisation/Institute                                                  |
|-----|---------------------------------------------------|----------------------------------------------------------------------------------|
| 1   | Suzanne Norris<br><i>(Principal investigator)</i> | Department of Hepatology, St. James's Hospital, Dublin 8                         |
| 2   | Michael Barry                                     | Department of Pharmacology & Therapeutics, St James's Hospital, Dublin 8         |
| 3   | Colm Bergin                                       | St James's Hospital, Dublin 8                                                    |
| 4   | Mary Cannon                                       | Beaumont Hospital, Dublin                                                        |
| 5   | Jeff Connell                                      | UCD National Virus Reference Laboratory, Belfield, Dublin 4                      |
| 6   | Suzie Coughlan                                    | UCD National Virus Reference Laboratory, Belfield, Dublin 4                      |
| 7   | Miriam Coghlan                                    | Pharmacy Department, Hospital 7, St. James's Hospital, Dublin 8                  |
| 8   | Garry Courtney                                    | St. Luke's Hospital, Kilkenny                                                    |
| 9   | Grainne Cousins                                   | Royal College of Surgeons in Ireland, Dublin 2                                   |
| 10  | Orla Crosbie                                      | University Hospital Cork, Cork                                                   |
| 11  | Cillian De Gascun                                 | UCD National Virus Reference Laboratory, Belfield, Dublin 4                      |
| 12  | Liam Fanning                                      | Department of Medicine, Cork University Hospital, Cork                           |
| 13  | Kathryn Feeley                                    | St Vincent's University Hospital, Elm Park, Dublin 4                             |
| 14  | Eoin Feeny                                        | St. Vincent's University Hospital, Elm Park, Dublin 4                            |
| 15  | Catherine Fleming                                 | Galway University Hospital, Galway                                               |
| 16  | Clair Gardiner                                    | School of Biochemistry and Immunology, TCD                                       |
| 17  | Emma Gray                                         | National Centre for Pharmacoeconomics in Ireland, St. James's Hospital, Dublin 8 |
| 18  | Sheila Heffernan                                  | HSE National Drug Treatment Centre, Dublin 2                                     |
| 19  | John Hegarty                                      | St Vincent's Hospital, Dublin                                                    |
| 20  | Diarmaid Houlihan                                 | St Vincent's Hospital, Dublin                                                    |
| 21  | Helena Irish                                      | St. James's Hospital, Dublin 8                                                   |
| 22  | Shay Keating                                      | National Drug Treatment Centre                                                   |

|    |                      |                                                                          |
|----|----------------------|--------------------------------------------------------------------------|
| 23 | Jennifer Ann Kieran  | Department of Pharmacology & Therapeutics, St James's Hospital, Dublin 8 |
| 24 | Barry Kelleher       | Mater Misericordiae University Hospital, Dublin 7                        |
| 25 | John Lambert         | Mater, Rotunda & UCD Dublin                                              |
| 26 | John Lee             | University Hospital Galway, Galway                                       |
| 27 | Paddy Mallon         | UCD School of Medicine and Medical Science, UCD, Belfield, Dublin 4      |
| 28 | Samuel McConkey      | Royal College of Surgeons in Ireland, Dublin 2                           |
| 29 | Aiden McCormick      | St Vincent's Hospital, Dublin                                            |
| 30 | Susan McKiernan      | St. James's Hospital, Dublin 8                                           |
| 31 | John Moloney         | HSE, Co Dublin                                                           |
| 32 | Busi Mooka           | University of Limerick                                                   |
| 33 | Frank Murray         | Beaumont Hospital, Dublin                                                |
| 34 | Ursula Norton        | Wheatfield Place of Detention, Dublin 22                                 |
| 35 | Mairead O'Connor     | Pharmacy Department, Mater Misericordiae University Hospital, Dublin 7   |
| 36 | Cliona O'Farrelly    | Trinity BioSciences Institute, Trinity College, Dublin 2                 |
| 37 | Aisling O'Leary      | RCSI School of Pharmacy, Royal College of Surgeons in Ireland, Dublin 2  |
| 38 | Brian O'Mahony       | Irish Haemophilia Society Ltd, Dublin 8                                  |
| 39 | Nicola Perry         | Community Response, Carman's Hall, Dublin 8                              |
| 40 | Mark Robinson        | Trinity Biomedical Sciences Institute, Trinity College, Dublin 2         |
| 41 | Nigel John Stevenson | Trinity Biomedical Sciences Institute, Trinity College Dublin, Dublin 2  |
| 42 | Stephen Stewart      | Mater Misericordiae University Hospital, Dublin 7                        |
| 43 | Michele Tait         | HSE, Mill Lane, Palmerstown, Dublin 20                                   |
| 44 | Lelia Thornton       | Health Protection Surveillance Centre, Dublin 1                          |
| 45 | Cathal Walsh         | University of Limerick                                                   |
| 46 | Caroline Walsh       | Liver Unit in the Mater Misericordiae University Hospital, Dublin 7      |
